# Supplementary material for: Structure of dual BON-domain protein DolP identifies phospholipid binding as a new mechanism for protein localisation
Source: eLife. 2020 Dec 14;9:e62614. doi: 10.7554/eLife.62614 (PMC7806268; doi:10.7554/eLife.62614)
Supplement: Figure 1—figure supplement 4—source data 1. [file elife-62614-fig1-figsupp4-data1.xlsx]

## Sheet: Sheet1
Day 1													WT			yraP
	WT			average	st dev		yraP			average	st dev		Average total	St Dev Total		Average total	St Dev Total
Time (hours)	Rep 1	Rep 2	Rep 3				Rep 1	Rep 2	Rep 3
0	0.05	0.05	0.05	0.05	8.49837e-18		0.05	0.05	0.05	0.05	8.49837e-18		0.05	7.35981e-18		0.05	7.35981e-18
1	0.092	0.1	0.1	0.0973333	0.0046188		0.1	0.09	0.09	0.0933333	0.0057735		0.100333	0.00424264		0.0972222	0.00635959
2	0.37	0.374	0.38	0.374667	0.00503322		0.435	0.398	0.414	0.415667	0.0185562		0.377778	0.00643774		0.434556	0.0200132
3	1.27	1.3	1.315	1.295	0.0229129		1.315	1.305	1.32	1.31333	0.00763763		1.30278	0.0188201		1.31756	0.00687588
4	2.33	2.36	2.31	2.33333	0.0251661		2.38	2.35	2.36	2.36333	0.0152753		2.34122	0.0292565		2.38456	0.0433218
5	3.3	3.32	3.32	3.31333	0.011547		3.34	3.46	3.46	3.42	0.069282		3.32333	0.033541		3.449	0.0659848
6	3.8	3.87	3.86	3.84333	0.0378594		3.9	4.1	4.02	4.00667	0.100664		3.85567	0.0339706		4.03022	0.0946596
7	4.55	4.62	4.59	4.58667	0.0351188		4.61	4.72	4.7	4.67667	0.0585947		4.595	0.0263011		4.71367	0.0436807
8	5.1	5.08	5.12	5.1	0.02		5.14	5.12	5.24	5.16667	0.064291		5.12211	0.0612422		5.18178	0.0571703
Day 2
	WT			average	st dev		yraP			average	st dev
Time (hours)	Rep 1	Rep 2	Rep 3				Rep 1	Rep 2	Rep 3
0	0.05	0.05	0.05	0.05	8.49837e-18		0.05	0.05	0.05	0.05	8.49837e-18
1	0.095	0.102	0.103	0.1	0.0043589		0.101	0.09	0.103	0.098	0.007
2	0.37	0.374	0.38	0.374667	0.00503322		0.455	0.426	0.442	0.441	0.0145258
3	1.28	1.315	1.313	1.30267	0.0196554		1.316	1.32	1.319	1.31833	0.00208167
4	2.36	2.33	2.31	2.33333	0.0251661		2.4	2.36	2.35	2.37	0.0264575
5	3.29	3.31	3.32	3.30667	0.0152753		3.34	3.46	3.46	3.42	0.069282
6	3.8	3.87	3.86	3.84333	0.0378594		3.9	4.152	4.02	4.024	0.126048
7	4.56	4.623	4.599	4.594	0.0317962		4.7	4.731	4.75	4.727	0.0252389
8	5.213	5.08	5.13	5.141	0.0671789		5.2	5.12	5.24	5.18667	0.061101
Day 3
	WT			average	st dev		yraP			average	st dev
Time (hours)	Rep 1	Rep 2	Rep 3				Rep 1	Rep 2	Rep 3
0	0.05	0.05	0.05	0.05	8.49837e-18		0.05	0.05	0.05	0.05	8.49837e-18
1	0.103	0.105	0.103	0.103667	0.0011547		0.103	0.093	0.105	0.100333	0.0064291
2	0.38	0.39	0.382	0.384	0.0052915		0.46	0.431	0.45	0.447	0.0147309
3	1.29	1.32	1.322	1.31067	0.0179258		1.33	1.312	1.321	1.321	0.009
4	2.4	2.35	2.321	2.357	0.0399625		2.481	2.42	2.36	2.42033	0.0605007
5	3.3	3.4	3.35	3.35	0.05		3.51	3.521	3.49	3.507	0.0157162
6	3.9	3.88	3.861	3.88033	0.0195021		4	4.16	4.02	4.06	0.087178
7	4.6	4.623	4.59	4.60433	0.0169214		4.73	4.722	4.76	4.73733	0.0200333
8	5.156	5.02	5.2	5.12533	0.0938367		5.2	5.12	5.256	5.192	0.068352
