# Supplementary material for: Structure of dual BON-domain protein DolP identifies phospholipid binding as a new mechanism for protein localisation
Source: eLife. 2020 Dec 14;9:e62614. doi: 10.7554/eLife.62614 (PMC7806268; doi:10.7554/eLife.62614)
Supplement: Figure 2—source data 2. [file elife-62614-fig2-data2.xlsx]

## Sheet: Sheet1
Figure 2B - Source data
S2 order parameter analysis
Residue No.	S2 order parameter
20	0.7
21	0.69
22	0.58
23	0.523
24	0.506
25	0.564
26	0.58
27	0.525
28	0.444
29	0.41
30	0.428
31	0.495
32	0.517
33	0.471
34	0.432
35	0.473
36	0.563
37	0.657
38	0.58
39	0.488
40	0.374
41	0.357
42	0.378
43	0.491
44	0.599
45	0.736
46	0.81
47	0.879
48	0.887
49	0.905
50	0.907
51	0.922
52	0.915
53	0.913
54	0.9
55	0.9
56	0.889
57	0.881
58	0.855
59	0.814
60	0.8
61	0.808
62	0.854
63	0.874
64	0.881
65	0.867
66	0.87
67	0.873
68	0.893
69	0.892
70	0.897
71	0.893
72	0.904
73	0.9
74	0.892
75	0.826
76	0.786
77	0.755
78	0.789
79	0.832
80	0.88
81	0.898
82	0.891
83	0.878
84	0.861
85	0.853
86	0.821
87	0.827
88	0.838
89	0.877
90	0.886
91	0.885
92	0.882
93	0.879
94	0.886
95	0.893
96	0.9
97	0.897
98	0.876
99	0.84
100	0.814
101	0.811
102	0.828
103	0.82
104	0.814
105	0.818
106	0.852
107	0.871
108	0.868
109	0.835
110	0.825
111	0.81
112	0.829
113	0.827
114	0.828
115	0.781
116	0.751
117	0.754
118	0.794
119	0.843
120	0.864
121	0.881
122	0.881
123	0.889
124	0.898
125	0.913
126	0.917
127	0.914
128	0.913
129	0.91
130	0.903
131	0.898
132	0.897
133	0.9
134	0.891
135	0.879
136	0.85
137	0.807
138	0.785
139	0.778
140	0.81
141	0.803
142	0.807
143	0.746
144	0.736
145	0.726
146	0.775
147	0.817
148	0.852
149	0.868
150	0.866
151	0.86
152	0.858
153	0.858
154	0.865
155	0.875
156	0.89
157	0.902
158	0.902
159	0.891
160	0.879
161	0.881
162	0.891
163	0.904
164	0.906
165	0.903
166	0.896
167	0.897
168	0.888
169	0.884
170	0.885
171	0.895
172	0.899
173	0.883
174	0.842
175	0.771
176	0.72
177	0.698
178	0.717
179	0.702
180	0.723
181	0.754
182	0.846
183	0.885
184	0.893
185	0.845
186	0.797
187	0.776
188	0.786
189	0.788
190	0.625
191	0.5
192	0.408
193	0.384
194	0.352
195	0.332
