# Supplementary material for: Structure of dual BON-domain protein DolP identifies phospholipid binding as a new mechanism for protein localisation
Source: eLife. 2020 Dec 14;9:e62614. doi: 10.7554/eLife.62614 (PMC7806268; doi:10.7554/eLife.62614)
Supplement: Figure 3—figure supplement 2—source data 2. [file elife-62614-fig3-figsupp2-data2.xlsx]

## Sheet: Lipidomics Inner Membrane
Figure 3-figure supplement 2B - Source Data
	Wild type			Mutant
lysoPE 14:0	0.109244	0.146722	0.136894			0.0445358
lysoPE 15:0		0.0839348	0.0876103		0.11031	0.0964887
lysoPE 16:1	1.2817	1.61385	1.72497	1.60704	1.97741	2.20414
lysoPE 16:0	1.28275	1.41986	1.52826	1.52111	1.76223	1.75358
lysoPE 17:1	0.411742	0.393626	0.429818	0.580229	0.562689	0.53203
lysoPE 17:0	0.0966479	0.105374	0.12737	0.136208	0.188215	0.10555
lysoPE 18:1	1.06721	1.28143	1.2648	1.37234	1.59723	1.64954
lysoPE 18:0	0.0488497	0.0678327	0.0783624	0.0737599	0.0915986	0.0772665
lysoPE 19:1	0.0195672	0.0310566	0.0539387	0.0509175	0.0693836	0.072333
PE 27:0						0.0322021
PE 28:1	0.266223	0.288253	0.260259	0.114314	0.263909	0.249948
PE 28:0	0.453799	0.512297	0.506187	0.333337	0.584802	0.573059
PE 29:1	0.105354	0.104827	0.10138		0.151559	0.112346
PE 29:0	0.257917	0.473863	0.368047	0.180712	0.486655	0.454252
PE 30:2	0.130378	0.179873	0.172853	0.111608	0.185238	0.20657
PE 30:1	4.31614	4.35157	4.14242	3.89513	4.23718	4.27487
PE 30:0	3.63796	3.79965	4.37206	3.60142	2.27508	4.37975
PE 31:2	0.122597	0.124591	0.123276	0.0776204	0.15326	0.10404
PE 31:1	1.7191	3.55284	3.47842	3.22178	3.64268	3.28397
PE 31:0	0.608886	0.42532	0.65118	0.535339	0.636427	0.51978
PE 32:2	6.86797	7.10841	6.69872	6.42176	6.45783	7.07807
PE 32:1	18.8733	14.6084	15.4517	19.2127	14.9432	15.0858
PE 32:0	1.14712	1.2286	1.50512	0.989493	1.07928	1.3542
PE 33:2	2.40358	2.80147	2.60971	2.39069	3.1613	2.61359
PE 33:1	7.58505	6.71678	7.4633	7.53502	7.19436	6.28938
PE 33:0	0.185788	0.0791989	0.0853673	0.199951	0.220959	0.147502
PE 34:2	9.02446	8.79238	8.52605	8.61622	8.66657	8.491
PE 34:1	8.24009	6.79147	7.27193	8.24941	7.24624	6.95977
PE 34:0		0.176139	0.174099		0.201993	0.164786
PE 35:2	1.87366	2.03188	2.2697	1.88151	2.26487	2.02794
PE 35:1	1.48042	1.79873	1.64931	1.49931	2.09392	1.6336
PE 35:0		0.0845723	0.138941		0.0678782	0.168394
PE 36:2	3.36775	3.65211	3.69115	3.45906	1.99527	3.85284
PE 36:1	0.367476	0.493991	0.488652	0.151214	0.583271	0.283257
PE 37:2	0.253816	0.37441	0.324522	0.22791	0.401605	0.287704
PE 37:1		0.0784976	0.0776592		0.072675	0.0481101
PE 38:2		0.0538254	0.0280641		0.0562094	0.0418677
PG 28:0		0.0272405
PG 29:0						0.00912028
PG 30:1	0.192413	0.209473	0.186026	0.0783642	0.219769	0.194152
PG 30:0	0.259284	0.288161	0.239965	0.225602	0.279303	0.238705
PG 31:1	0.257812	0.17113	0.243703	0.254203	0.309241	0.236775
PG 31:0	0.0723387	0.198908	0.181487	0.0837125	0.194169	0.205647
PG 32:2	0.504583	0.555102	0.50325	0.404647	0.51302	0.511558
PG 32:1	4.66416	4.81787	4.38541	4.24013	4.37241	4.49134
PG 32:0	0.301131	0.374227	0.341523	0.241634	0.368436	0.323447
PG 33:2	0.290196	0.307834	0.26818	0.283573	0.308731	0.267483
PG 33:1	1.84737	1.91986	1.85225	1.94179	2.23511	1.69065
PG 33:0	0.0466732	0.0884066	0.0645306	0.0471212	0.0948305	0.0950623
PG 34:2	2.96505	3.22132	2.93013	2.84471	2.92911	3.16231
PG 34:1	4.42759	4.30147	4.21896	4.45689	4.49318	4.28074
PG 34:0	0.0281259	0.0614574	0.0383178	0.0623836	0.0745461	0.0658305
PG 35:2	0.453063	0.621587	0.481977	0.569584	0.740443	0.514998
PG 35:1	0.691634	0.765486	0.716601	0.724132	0.944052	0.66359
PG 35:0		0.0475321		0.0416318	0.0444725
PG 36:2	2.04294	2.37706	2.18514	2.02516	2.32271	2.26203
PG 36:1	0.161711	0.225502	0.193236	0.176865	0.212624	0.211268
PG 37:2	0.0809605	0.0991807	0.0784247	0.0660132	0.11133	0.092713
PG 37:1					0.0317236	0.0246843
CL 62:2	0.0354544	0.0757927	0.0499244		0.0683035	0.056492
CL 62:1	0.0561887	0.0626596	0.0278505		0.0335862	0.0381004
CL 63:2	0.0369054	0.0581787	0.0697019		0.0609977	0.0372362
CL 63:1		0.041339			0.0196295	0.0281747
CL 64:3	0.154351	0.146358	0.113752	0.0842127	0.142713	0.122163
CL 64:2	0.536337	0.437251	0.324611	0.267285	0.330758	0.321601
CL 65:3	0.0602051	0.089463	0.0354874		0.0653607	0.0666275
CL 65:2	0.134689	0.0840167	0.108233	0.21175	0.198251	0.154885
CL 66:4		0.0459018	0.0523543	0.0315253	0.0467263	0.0472375
CL 66:3	0.522878	0.349	0.373476	0.373609	0.425164	0.400386
CL 66:2	0.427513	0.480421	0.440143	0.756067	0.477639	0.308596
CL 67:4						0.0101355
CL 67:3	0.109349	0.133243	0.135826	0.136977	0.139056	0.111423
CL 67:2	0.168124	0.163844	0.184869	0.141466	0.185579	0.119562
CL 68:4	0.114606	0.118944	0.112951		0.0934697	0.14381
CL 68:3	0.221853	0.345903	0.3911	0.473007	0.409685	0.433276
CL 68:2	0.116289	0.274227			0.207436	0.256073
CL 69:3	0.0918533	0.12796	0.092924	0.153009	0.11907	0.10597
CL 69:2		0.052778			0.0657605	0.0657717
CL 69:1					0.0452039
CL 70:4	0.0779744	0.129053	0.0804274	0.121112	0.105292	0.104292
CL 70:3	0.195672	0.205465	0.141433	0.234708	0.187109	0.209926
CL 70:2						0.0234509
CL 71:3		0.0346176	0.0335292		0.0334756	0.0195411
CL 72:4	0.0462421	0.0370949	0.0601692		0.057196	0.0191132

## Sheet: Lipidomics Outer Membrane
	Wild type			Mutant
lysoPE 14:0	0.863834	0.71841	0.632136	0.807158	0.641344	0.609461
lysoPE 15:0	0.253438	0.442336	0.457298	0.521162	0.549649	0.387885
lysoPE 16:1	9.58411	9.2607	8.27748	10.2525	9.22644	8.23325
lysoPE 16:0	5.87595	6.04566	5.98162	5.76954	5.626	4.81622
lysoPE 17:1	4.24473	4.3743	4.46626	5.02007	5.02921	3.42645
lysoPE 17:0	0.505659	0.465521	0.309265	0.514989	0.612851	0.316426
lysoPE 18:1	7.51934	8.03087	8.23675	8.712	8.9985	6.90345
lysoPE 18:0	0.241452	0.207526	0.249465	0.190222	0.259076	0.196042
lysoPE 19:1	0.417731	0.384944	0.431228	0.469756	0.589021	0.319853
lysoPE 19:0	0.0951856				0.031793
PE 26:0	0.0714009	0.0486422	0.0583416	0.048966	0.068693	0.027915
PE 27:0	0.0231339	0.0333264	0.0560848		0.059576	0.037683
PE 28:1	0.510341	0.360347	0.417866	0.320902	0.489711	0.377175
PE 28:0	1.98471	0.954968	0.861966	0.771964	0.981183	0.758891
PE 29:1	0.135592	0.115725	0.103306	0.117583	0.158523	0.095793
PE 29:0	0.75802	0.737227	0.664561	0.511123	0.691076	0.602777
PE 30:2	0.21041	0.171437	0.141027	0.161201	0.198153	0.147888
PE 30:1	5.00041	4.74728	4.89642	4.49562	4.88001	4.52833
PE 30:0	5.09405	5.32255	5.75106	4.66871	4.8251	5.40315
PE 31:2	0.072946	0.057372	0.0660976		0.062684	0.049422
PE 31:1	3.23856	3.38036	3.22137	2.76534	3.71285	2.86865
PE 31:0	0.714009	0.906581	1.11453	0.788696	0.867213	0.855713
PE 32:2	4.73821	4.0524	4.56647	4.03752	4.779	4.73225
PE 32:1	11.1198	11.9421	14.119	14.0719	10.9723	13.7949
PE 32:0	0.619901	1.65658	1.81762	1.36046	1.29408	1.61426
PE 33:2	1.66118	1.50335	1.53655	0.953127	1.8686	1.42405
PE 33:1	4.84122	5.81784	3.1676	4.93526	5.51203	5.99093
PE 33:0	0.218136	0.253964	0.250035	0.378135	0.299898	0.23914
PE 34:2	4.89272	5.74929	6.16086	4.83487	5.37216	7.08938
PE 34:1	4.97231	6.29096	6.60243	6.46188	5.19602	6.42791
PE 34:0	0.230918	0.240657	0.227142	0.167432	0.235971	0.15937
PE 35:2	0.827314	0.974457	1.06076	0.639842	1.05319	1.09931
PE 35:1	1.38869	1.36962	1.3842	1.40546	1.59041	1.37949
PE 35:0	0.0234429		0.076803		0.02898	0.115586
PE 36:2	2.19025	2.66598	2.55494	2.01876	2.34002	3.13598
PE 36:1	0.479908	0.492067	0.427887	0.338095	0.519084	0.406136
PE 37:2	0.144206	0.14012	0.157077	0.138065	0.205303	0.154657
PE 37:1	0.0375031				0.060871	0.061015
PE 38:2	0.0403216	0.0445239	0.0152596		0.04592
PG 28:0	0.0139524
PG 30:1	0.112509	0.0835345	0.0735115	0.092543	0.056519	0.083498
PG 30:0	0.258261	0.182727	0.149011	0.200376	0.108065	0.181133
PG 31:1	0.214062	0.134139	0.115771	0.149546	0.10304	0.14052
PG 31:0	0.190839	0.108265	0.134265	0.1522	0.122933	0.161169
PG 32:2	0.284386	0.1918	0.170764	0.170778	0.137542	0.2322
PG 32:1	3.34671	2.32122	2.51013	2.51032	1.97169	2.83267
PG 32:0	0.392448	0.289313	0.273825	0.320382	0.242965	0.296376
PG 33:2	0.156052	0.0960344	0.0919811	0.109679	0.091902	0.113187
PG 33:1	1.20796	0.82392	0.839969	1.14756	0.919018	0.910807
PG 33:0	0.0449802	0.0537967	0.0435464	0.095717	0.057918	0.033673
PG 34:2	1.5961	1.26679	1.01595	1.2566	1.20032	1.38549
PG 34:1	3.3528	2.33937	2.4034	2.80572	2.48093	2.72471
PG 34:0	0.043791	0.0429433	0.0400594	0.048955	0.043521	0.030255
PG 35:2	0.291222	0.181988	0.155692	0.185375	0.23048	0.183532
PG 35:1	0.490677	0.326947	0.336232	0.53524	0.497171	0.1945
PG 35:0	0.0153992	0.0162499		0.017984	0.030176
PG 36:2	1.27632	0.862226	0.900258	1.00563	1.09205	1.04276
PG 36:1	0.124308	0.0819216	0.0839969	0.110833	0.107599	0.096821
PG 37:2	0.0451394	0.0288574	0.028792	0.051014	0.042439	0.027598
PG 37:1	0.0135451
CL 62:2	0.026725	0.0194757			0.014469
CL 62:1	0.0324745	0.029899			0.021582	0.021986
CL 63:2	0.0173095				0.011009
CL 63:1					0.008931
CL 64:3	0.0215186	0.0205644			0.015391	0.015688
CL 64:2	0.148608	0.100739	0.0364666	0.066523	0.083199	0.117642
CL 64:1					0.018443
CL 65:2	0.0256482	0.0345697			0.017039	0.033253
CL 66:3	0.0951856	0.0616932	0.0167261	0.052272	0.059576	0.056225
CL 66:2	0.125572	0.163037	0.0424384	0.117122	0.092057	0.135464
CL 67:3					0.008605
CL 67:2	0.0292018	0.0279501			0.0267
CL 68:4	0.0295623	0.0169824			0.016148	0.006255
CL 68:3	0.0635819	0.0594822		0.050541	0.058643	0.058761
CL 68:2	0.0372502	0.0203292	0.0184777	0.079908	0.03301	0.045592
CL 68:1		0.0324796
CL 69:3	0.0199454				0.009035
CL 70:4					0.015324	0.020967
CL 70:3	0.0148889	0.0207324		0.018901	0.022095	0.030469

## Sheet: Lipidomics Total Inner Membrane
	Wild type			Mutant
lysoPE	4.31771	5.14368	5.43202	5.34161	6.35907	6.53546
PE	73.2888	70.684	72.6301	72.9055	69.3243	70.7186
PG	19.287	20.6788	19.1091	18.7681	20.7992	19.5421
CL	3.10649	3.49351	2.82876	2.98473	3.51746	3.20384

## Sheet: Lipidomics Total Outer Membrane
	Wild type			Mutant
lysoPE	29.6014	29.9303	29.0415	32.2574	31.5639	25.209
PE	56.2396	60.0297	61.4772	56.3909	58.3686	63.5778
PG	13.4715	9.43205	9.36715	10.9665	9.53627	10.6709
CL	0.687472	0.607933	0.114109	0.385267	0.531253	0.542303
