# Supplementary material for: Structure of dual BON-domain protein DolP identifies phospholipid binding as a new mechanism for protein localisation
Source: eLife. 2020 Dec 14;9:e62614. doi: 10.7554/eLife.62614 (PMC7806268; doi:10.7554/eLife.62614)
Supplement: Figure 3—figure supplement 2—source data 3. [file elife-62614-fig3-figsupp2-data3.xlsx]

## Sheet: PagP assay
Figure 3-figure supplement 2C - Source data
	32P-PagP analysis
	Jack YraP strains
	#	Cells	Lipid A							Average		SD			Hypothesis: Mutants accumulate Hepta lipid A > WT or < mutant (1 tail distribution, 2-sample equal variance)
			Repeat 1		Repeat 2		Repeat 3
			Hepta	Hexa	Hepta	Hexa	Hepta	Hexa		Hepta	Hexa	Hepta	Hexa		T-test for hepta			Value	with respect to #
	1	BW25113 pET17b	4.81	95.19	5.14	94.86	3.79	96.21		4.58	95.42	0.703776	0.703776		4.81	5.14	3.79
	2	BW25113 pET17b + 25 mM EDTA	27.96	72.04	27.09	72.91	23.96	76.04		26.3367	73.6633	2.10372	2.10372		27.96	27.09	23.96
	3	BW25113 ΔyraP pET17b	5.45	94.55	5.15	94.85	3.73	96.27		4.77667	95.2233	0.918767	0.918767		5.45	5.15	3.73	0.391575	1		Not Significant > 0.10
	4	BW25113 ΔyraP pET17b yraP	5.55	94.45	4.39	95.61	3.37	96.63		4.43667	95.5633	1.09075	1.09075		5.55	4.39	3.37	0.428822	1		Not Significant > 0.10			3	0.350416	Not Significant > 0.10
	5	BW25113 pET17b yraP	5.85	94.15	4.45	95.55	4.62	95.38		4.97333	95.0267	0.763959	0.763959		5.85	4.45	4.62	0.273856	1		Not Significant > 0.10
	8	BW25113 ΔmlaApET17b	12.12	87.88	10.18	89.82	9.95	90.05		10.75	89.25	1.19202	1.19202		12.12	10.18	9.95
