# Supplementary material for: Structure of dual BON-domain protein DolP identifies phospholipid binding as a new mechanism for protein localisation
Source: eLife. 2020 Dec 14;9:e62614. doi: 10.7554/eLife.62614 (PMC7806268; doi:10.7554/eLife.62614)
Supplement: Figure 3—figure supplement 2—source data 4. [file elife-62614-fig3-figsupp2-data4.xlsx]

## Sheet: Membrane Fluidity
Figure 3-figure supplement 2D - Source Data
Fluorescence (FI), multichromatic
Well Row	Well Col	Content	Raw Data (350-15/400-20 1)	Raw Data (350-15/470-20 2)
C	1	Sample X1	2626	6466
C	2	Sample X2	43380	19172	40754	12706	0.311773
C	3	Sample X3	44196	19476	41570	13010	0.312966	0.315368	0.00522799	1	WT	86 mM NaCl
C	4	Sample X4	44015	19767	41389	13301	0.321366
C	5	Sample X5	2575	6918
C	6	Sample X6	64616	37337	62041	30419	0.490305
C	7	Sample X7	65188	37667	62613	30749	0.491096	0.495783	0.00881256	1.57208	ΔyraP
C	8	Sample X8	65024	38514	62449	31596	0.505949
C	9	Sample X9	2099	8478
C	10	Sample X10	123974	117753	121875	109275	0.896615
C	11	Sample X11	120902	115150	118803	106672	0.89789	0.897886	0.00126947	2.8471	ΔgmhD
C	12	Sample X12	118217	112886	116118	104408	0.899154
D	1	Sample X13	2611	7764
D	2	Sample X14	31176	14240	28565	6476	0.226711
D	3	Sample X15	30590	14337	27979	6573	0.234926	0.232856	0.00541484	0.738361	WT	172 mM NaCl
D	4	Sample X16	31780	14675	29169	6911	0.23693
D	5	Sample X17	2653	7966
D	6	Sample X18	46827	25822	44174	17856	0.40422
D	7	Sample X19	46227	26118	43574	18152	0.416579	0.410834	0.00622522	1.30271	ΔyraP
D	8	Sample X20	45820	25738	43167	17772	0.411703
D	9	Sample X21	1823	7717
D	10	Sample X22	75480	71464	73657	63747	0.865457
D	11	Sample X23	75568	69484	73745	61767	0.837575	0.852498	0.0140443	2.70318	ΔgmhD
D	12	Sample X24	74649	69944	72826	62227	0.854461
