# Supplementary material for: Structure of dual BON-domain protein DolP identifies phospholipid binding as a new mechanism for protein localisation
Source: eLife. 2020 Dec 14;9:e62614. doi: 10.7554/eLife.62614 (PMC7806268; doi:10.7554/eLife.62614)
Supplement: Figure 3—source data 1. [file elife-62614-fig3-data1.xlsx]

## Sheet: Cardiolipin
Figure 3 and Figure 4 -Source data
Lipid titration results
Residue No.	Cardiolipin (5mM) normalised chemical shift
20	0.00154
21	0.00429958
22	0.002002
23	0.00231
24	0.00667544
25
26
27	0.00502844
28
29
30	0.00337218
31	0.00671209
32	0.00344523
33	0.0106612
34	0.003
35	0.001
36	0.001232
37
38
39	0.00633025
40	0.0025242
41
42	0.00101179
43	0.00104636
44	0.00183619
45	0.00202358
46	0.00713589
47	0.00282984
48	0.00848952
49	0.00786856
50	0
51	0.00136153
52	0.001
53	0.002349
54	0.00472699
55	0.00205267
56	0.00205267
57	0.00101179
58	0.0119357
59	0.0025242
60	0.00300395
61	0.00200592
62	0.00303537
63	0.0037863
64	0.00317353
65	0.00101179
66	0.00447571
67	0.00646736
68	0.00282984
69
70	0.005
71	0.00352351
72	0.004774
73	0.00595473
74	0.0216429
75	0.0110011
76	0.00368046
77	0.0130146
78
79	0.00533058
80	0.00611101
81
82	0.00816921
83	0.000462
84	0.00527917
85	0.00209272
86
87	0.00170909
88	0.00623455
89	0.00306259
90	0.00183619
91	0.00220313
92	0.0030555
93	0.00110156
94	0.000308
95	0.00612518
96	0.000308
97	0
98	0.000924
99	0.00227202
100	0.000154
101	0.000308
102	0.0011745
103	0.00317353
104	0.0050378
105	0.0072161
106	0.00433849
107	0.00500237
108	0.00410533
109
110
111	0.00900132
112	0.00210122
113	0.00601776
114
115
116
117	0.0141893
118	0.00631051
119	0.0268433
120	0.0533132
121	0.0376073
122	0.0418183
123	0.0268556
124
125	0.0341537
126
127	0.0444576
128	0.0472418
129	0.0105705
130	0.0335679
131	0.0189219
132	0.0200691
133	0.0290494
134	0.0319253
135	0.0160285
136	0.0173673
137	0.0663279
138	0.0220905
139	0.0211713
140	0.0107353
141	0.0279392
142	0.0205482
143	0.0298228
144	0.0779152
145	0.0350454
146	0.00912392
147	0.0175373
148	0.00560497
149
150
151	0.0461142
152	0.00488083
153
154	0.0085183
155
156	0.0149593
157	0.0137965
158	0.00674436
159	0.0014704
160	0.0163236
161	0.0120984
162	0.00806549
163	0.00700677
164	0.00313907
165	0.00447571
166	0.0219346
167	0.00854062
168	0.019378
169	0.00654629
170	0.00382889
171	0.0100047
172
173	0.00579323
174	0.00550857
175	0.00681607
176	0.00404715
177	0.00757261
178
179	0.0199961
180
181
182	0.00472699
183	0.0029408
184
185
186
187	0.00330469
188	0.0115864
189	0.00856068
190	0.000154
191
192	0.00077
193	0.00202358
194	0.00220313
195	0.00309724

## Sheet: Phosphatidyl ethanolamine
Residue No.	Phosphatidyl ethanolamine 20mM - Normalised Chemical shift
20	0.00110156
21	0.003696
22	0.00380247
23	0.00550857
24	0.002618
25	0.00885287
26
27	0.00412699
28
29
30	0.00434392
31	0.00825397
32	0.00317353
33	0.013552
34	0.00447303
35	0.00101179
36	0.002002
37
38
39	0.000308
40	0
41
42	0.0014704
43	0.001694
44	0.000616
45	0.00210122
46	0.00154
47	0.0012621
48	0.001386
49	0.00104636
50	0.00183619
51	0.00220313
52	0.00434392
53	0.00077
54	0.000462
55	0.000308
56	0.002621
57	0.00170909
58	0.000308
59	0.000154
60	0.00101179
61	0.000462
62	0.00101179
63	0
64	0.00209272
65	0.001078
66	0.00313907
67	0.0050378
68	0.00300395
69
70	0.000616
71	0.001386
72	0.0081353
73	0.000154
74	0.00205267
75	0.00323827
76	0.008932
77	0.0031878
78
79	0.0106362
80	0.00385
81
82	0.000154
83	0.00170909
84	0.00200592
85	0.0011745
86
87	0.0014704
88	0.00104636
89	0.00101179
90	0.00101179
91	0.00136153
92	0.00104636
93	0.00110156
94	0.00158676
95	0.002349
96	0.0011745
97	0.0012621
98	0.0029408
99	0.0011745
100	0.00101179
101	0.000616
102	0.00196714
103	0.000154
104	0.000154
105	0.000462
106	0.00669708
107	0.00243331
108	0.00769714
109
110
111	0.00728066
112	0.00101179
113	0.000154
114	0.00964065
115
116
117	0.002349
118	0.00309216
119	0.0012621
120	0.00227202
121	0.00272307
122	0.00303537
123	0.00251716
124
125	0.00209272
126
127	0.00674436
128	0.0060079
129	0.0014704
130	0.001848
131	0.00701523
132	0.00154
133	0.00158676
134	0.0031878
135	0.0030555
136	0.0014704
137	0.00324312
138	0.00495595
139	0.00404715
140	0.00341818
141	0.00158676
142	0.00618433
143	0.0029408
144	0.00593683
145	0.00136153
146	0.00303537
147	0.00487761
148	0.00237662
149
150
151	0.00337218
152	0
153
154	0.0029408
155
156	0.0031878
157	0.003542
158	0.00700169
159	0.00220313
160	0.00953074
161	0.00511489
162	0.00200592
163	0.00205267
164	0.00360666
165	0.00647654
166	0.00712987
167	0.00077
168	0.016549
169	0.00220313
170	0.0014704
171	0.00728066
172
173	0.00210122
174	0.00210122
175	0.00309724
176	0.00196714
177	0.000616
178	0.00196714
179	0.0103025
180
181
182	0.00170909
183	0.00077
184
185
186	0.00464174
187	0.00200592
188	0.00654629
189	0.0039817
190	0.00427656
191
192	0.00223786
193	0.00158676
194	0.00077
195	0.001386

## Sheet: Phosphatidyl glycerol 20mM
Residue No.	Phosphatidyl glycerol 20mM Normalised Chemical shift
20	0.0129081
21	0.0216152
22	0.0214196
23	0.0187756
24	0.0158407
25	0.0360607
26
27	0.0190585
28
29
30	0.0193861
31	0.0200164
32	0.00360666
33	0.0335604
34	0.015358
35	0.00881251
36	0.00517945
37
38
39	0.00462
40	0.00488083
41
42	0.00548198
43	0.0167762
44	0.00486662
45	0.0148208
46	0.0158987
47	0.00681607
48	0.0162706
49	0.0106418
50	0.00603975
51	0.00265919
52	0.0097889
53	0.001848
54	0.00447571
55	0.00110156
56	0.00932446
57	0.0037863
58	0.00985048
59	0.00200592
60	0.006
61	0.00200592
62	0.000924
63	0.00341818
64	0.002464
65	0.00393428
66	0.00329453
67	0.016979
68	0.00512728
69
70	0.001848
71	0.00595473
72	0.0106418
73	0.00489338
74	0.0290331
75	0.0126605
76	0.0272851
77	0.00685169
78
79	0.0345283
80	0.0138349
81
82	0.002618
83	0.00868178
84	0.00500948
85	0.00603154
86
87	0
88	0.00488083
89	0.00544503
90	0.00623455
91	0.00214311
92	0.00734477
93	0.0050378
94	0.00223786
95	0.0131307
96	0.00214311
97	0
98	0.00608868
99	0.00883471
100	0.00301577
101	0.00414271
102	0.0046191
103	0.00309216
104	0.00800148
105	0.0189001
106	0.0214627
107	0.00382889
108	0.00952059
109
110
111	0.0235548
112	0.00303537
113	0.00593683
114	0.025945
115
116
117	0.0205982
118	0.002926
119	0.00985048
120	0.0489307
121	0.0494746
122	0.0381374
123	0.0625703
124	0.0788543
125	0.0292288
126	0.0523072
127	0.11463
128	0.06406
129	0.0248563
130	0.0928497
131	0.0833695
132	0.0541795
133	0.0936631
134	0.0226447
135	0.0745686
136	0.0398925
137	0.123459
138	0.0390049
139	0.0203386
140	0.0133742
141	0.0274741
142	0.0467109
143	0.0496298
144	0.0582062
145	0.0250312
146	0.0540911
147	0.00604921
148	0.00963592
149	0.0259843
150
151	0.020036
152	0.0163967
153
154	0.0119095
155	0.0225292
156	0.0163351
157	0.0203958
158	0.0323318
159	0.0107155
160	0.0155293
161	0.0260223
162	0.00621775
163	0.0123446
164	0.0176175
165	0.0222254
166	0.00758071
167	0.0113825
168	0.0293626
169	0.0269077
170	0.00550857
171	0.0160474
172	0.0342843
173	0.0211822
174	0.0224392
175	0.023087
176	0.0141424
177	0.00393428
178	0.0629935
179	0.0538802
180	0.0584182
181	0.0234933
182	0.0091309
183	0
184	0.0164459
185	0.018304
186	0.0227959
187	0.011815
188	0.011745
189	0.0288118
190	0.0310767
191	0.018751
192	0.0161404
193	0.00840486
194	0.0120534
195	0.0125145

## Sheet: Phosphatidyl glycerol 40mM
Residue No.	Phosphatidyl glycerol 40mM - Normalised Chemical Shift
20	0.0282935
21	0.0426451
22	0.0429331
23	0.0325412
24	0.0285125
25	0.0678846
26
27	0.0221324
28
29
30	0.0309067
31	0.0343741
32	0.0121774
33	0.0313592
34	0.0226447
35	0.0136062
36	0.0111466
37
38
39	0.00237662
40	0.00930352
41
42	0.009086
43	0.0261428
44	0
45	0.0232089
46	0.0148178
47	0.00802368
48	0.0280647
49	0.0204725
50	0.0111036
51	0.00609607
52	0.00469801
53	0
54	0.00825397
55	0.0179616
56	0.00412699
57	0.00306259
58	0.0258694
59	0.00814688
60	0.00817739
61	0.00511489
62	0.0037863
63	0.00632519
64	0.00805398
65	0.00761197
66	0.0103798
67	0.0115393
68	0.00447571
69
70	0.0139252
71	0.00893593
72	0.013244
73	0.0133469
74	0.0651139
75	0.0122538
76	0.0340628
77	0.011745
78
79	0.0321959
80	0.00525294
81
82	0.0165257
83	0.00862895
84	0.0057491
85	0.00600198
86
87	0
88	0.00571699
89	0.00931617
90	0.0091061
91	0
92	0.0107526
93	0.00401184
94	0.00301577
95	0.0258692
96	0.0082467
97	0
98	0
99	0.0131549
100	0.00868784
101	0.00811917
102	0.00811917
103	0.0120255
104	0.0117596
105	0.0357891
106	0.0325864
107	0.0079555
108	0
109
110
111	0.0296332
112	0.00803697
113	0.017308
114	0.0265477
115
116
117	0.0228813
118	0.001848
119	0.025508
120	0.0995571
121	0.103605
122	0.0863172
123	0.130867
124	0.120009
125	0.0660119
126	0.100308
127	0.208973
128	0.122012
129	0.0527699
130	0
131	0.161397
132	0.123737
133	0.18888
134	0.0167877
135	0.173533
136	0.0759135
137	0.230148
138	0.0589641
139	0.0378972
140	0.0170982
141	0.0562031
142	0.0804616
143	0.0915721
144	0.19445
145	0.0622565
146	0.0437682
147	0.0199593
148	0.0239667
149	0.0287488
150
151	0.0482318
152	0.0240967
153
154	0.0228137
155	0.0220828
156	0
157	0.0102362
158	0.0473673
159	0.02515
160	0.0100598
161	0.0390368
162	0
163	0.0220264
164	0.0285373
165	0.0285172
166	0.0297484
167	0.0217593
168	0.0396752
169	0.0365232
170	0.0128041
171	0.0114231
172	0.0568433
173	0.0622014
174	0.031456
175	0.0171776
176	0.0319835
177	0.0064395
178	0.137317
179	0.0783249
180	0.112342
181	0.019275
182	0.0128211
183	0
184	0.0192832
185	0
186	0.0289659
187	0.00946369
188	0.00457659
189	0.0445627
190	0.0505371
191	0.0370238
192	0.0254441
193	0.0203105
194	0.0442206
195	0.0259492
