# Supplementary material for: Structure of dual BON-domain protein DolP identifies phospholipid binding as a new mechanism for protein localisation
Source: eLife. 2020 Dec 14;9:e62614. doi: 10.7554/eLife.62614 (PMC7806268; doi:10.7554/eLife.62614)
Supplement: Figure 3—source data 2. [file elife-62614-fig3-data2.xlsx]

## Sheet: Sheet1
Figure 3 - Source data
Residue No.	Peak Intensity
20	60.9052
21	88.7347
22	92.8283
23	104.696
24	94.3254
25
26
27	102.412
28	98.2342
29
30	91.1517
31	95.5389
32	110.194
33	113.165
34	104.981
35	98.874
36	98.2422
37
38
39	95.6095
40	94.0646
41	80.2131
42	93.7789
43	100.215
44	107.411
45	105.508
46	111.009
47	95.7148
48	95.4795
49	98.447
50	89.585
51	106.125
52	95.1356
53	103.347
54	96.4395
55	101.818
56	100.812
57	97.9918
58	94.5922
59	102.752
60	103.839
61	94.7807
62	105.778
63	103.192
64	99.3533
65	103.129
66	104.893
67	94.5364
68	99.95
69	94.2107
70	95.5105
71	94.8103
72	83.8
73	115.303
74	93.4715
75	108.979
76	123.898
77	112.461
78	95.8795
79	119.876
80	91.5671
81
82	92.3108
83	107.29
84	91.5693
85	101.979
86
87	106.582
88	112.89
89	102.971
90	97.8348
91	92.3781
92	96.0506
93	107.959
94	104.406
95	115.998
96	101.77
97	105.152
98	92.9959
99	103.883
100	105.869
101	103.117
102	103.32
103	103.651
104	97.4571
105	95.5396
106	91.9334
107	91.7064
108	84.0725
109
110	80.8762
111	105.584
112	111.509
113	106.665
114	91.5374
115	100.649
116
117	95.4042
118	94.5325
119	94.5922
120	57.1119
121	48.6106
122	64.7828
123	28.1429
124	20.7793
125	75.3015
126	27.5753
127	26.9912
128	65.5435
129	58.028
130	41.1563
131	110.715
132	82.2303
133	56.387
134	42.3565
135	74.5442
136	85.1192
137	96.1985
138	71.362
139	81.7285
140	102.194
141	102.538
142	102.607
143	97.4526
144	95.94
145	104.021
146	71.2717
147	93.0921
148	96.0542
149
150	94.2107
151	83.7343
152	96.3558
153
154	115.054
155	75.819
156	136.474
157	101.492
158	107.991
159	99.0143
160	93.9478
161	101.693
162	105.805
163	98.0346
164	100.767
165	113.792
166	100.93
167	102.901
168	97.8864
169	100.807
170	97.9011
171	104.918
172	111.131
173	100.668
174	96.6305
175	112.227
176	114.723
177	97.9775
178
179	83.5121
180	115.869
181
182	112.433
183	92.958
184	143.777
185	147.491
186	123.069
187	102.027
188	113.56
189	96.6355
190	99.3937
191	98.2342
192	98.6773
193	95.0713
194	97.3744
195	96.7858

## Sheet: Sheet2
Residue No.	Phosphatidyl glycerol 40mM Average Chemical Shift
20	0.0282935
21	0.0426451
22	0.0429331
23	0.0325412
24	0.0285125
25	0.0678846
26
27	0.0221324
28
29
30	0.0309067
31	0.0343741
32	0.0121774
33	0.0313592
34	0.0226447
35	0.0136062
36	0.0111466
37
38
39	0.00237662
40	0.00930352
41
42	0.009086
43	0.0261428
44	0
45	0.0232089
46	0.0148178
47	0.00802368
48	0.0280647
49	0.0204725
50	0.0111036
51	0.00609607
52	0.00469801
53	0
54	0.00825397
55	0.0179616
56	0.00412699
57	0.00306259
58	0.0258694
59	0.00814688
60	0.00817739
61	0.00511489
62	0.0037863
63	0.00632519
64	0.00805398
65	0.00761197
66	0.0103798
67	0.0115393
68	0.00447571
69
70	0.0139252
71	0.00893593
72	0.013244
73	0.0133469
74	0.0651139
75	0.0122538
76	0.0340628
77	0.011745
78
79	0.0321959
80	0.00525294
81
82	0.0165257
83	0.00862895
84	0.0057491
85	0.00600198
86
87	0
88	0.00571699
89	0.00931617
90	0.0091061
91	0
92	0.0107526
93	0.00401184
94	0.00301577
95	0.0258692
96	0.0082467
97	0
98	0
99	0.0131549
100	0.00868784
101	0.00811917
102	0.00811917
103	0.0120255
104	0.0117596
105	0.0357891
106	0.0325864
107	0.0079555
108	0
109
110
111	0.0296332
112	0.00803697
113	0.017308
114	0.0265477
115
116
117	0.0228813
118	0.001848
119	0.025508
120	0.0995571
121	0.103605
122	0.0863172
123	0.130867
124	0.120009
125	0.0660119
126	0.100308
127	0.208973
128	0.122012
129	0.0527699
130	0
131	0.161397
132	0.123737
133	0.18888
134	0.0167877
135	0.173533
136	0.0759135
137	0.230148
138	0.0589641
139	0.0378972
140	0.0170982
141	0.0562031
142	0.0804616
143	0.0915721
144	0.19445
145	0.0622565
146	0.0437682
147	0.0199593
148	0.0239667
149	0.0287488
150
151	0.0482318
152	0.0240967
153
154	0.0228137
155	0.0220828
156	0
157	0.0102362
158	0.0473673
159	0.02515
160	0.0100598
161	0.0390368
162	0
163	0.0220264
164	0.0285373
165	0.0285172
166	0.0297484
167	0.0217593
168	0.0396752
169	0.0365232
170	0.0128041
171	0.0114231
172	0.0568433
173	0.0622014
174	0.031456
175	0.0171776
176	0.0319835
177	0.0064395
178	0.137317
179	0.0783249
180	0.112342
181	0.019275
182	0.0128211
183	0
184	0.0192832
185	0
186	0.0289659
187	0.00946369
188	0.00457659
189	0.0445627
190	0.0505371
191	0.0370238
192	0.0254441
193	0.0203105
194	0.0442206
195	0.0259492
